# Supplementary material
Source: MDPI journal article supplement (https://www.mdpi.com/2227-9717/9/1/73)
Supplement: s1 [file s1]

## Supplementary Figures:

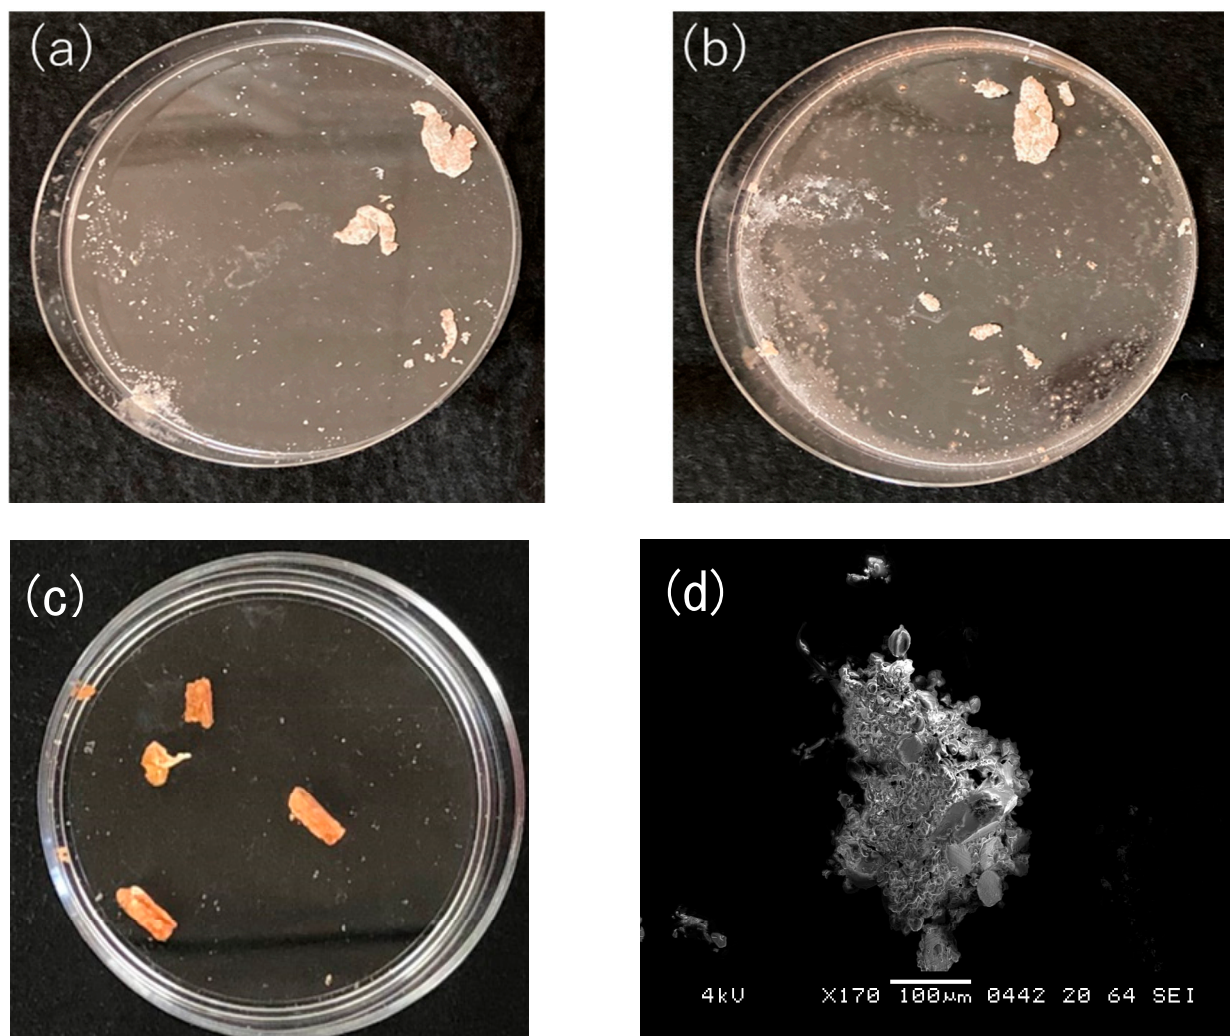

**Figure S1.** Images of Lf loaded shellac microparticle-agglomeration by PGSS process at (a) 20 °C, (b) 30 °C, and (c) 50 °C, at 10 MPa. SEM images of shellac (sole) microparticles produced by PGSS process at 10 MPa and at 50 °C (d).
